# Supplementary material for: Reinforcement of Gametic Isolation in Drosophila
Source: PubMed Central journal article supplement (PMC2843595; doi:10.1371/journal.pbio.1000341), 2010-03-23

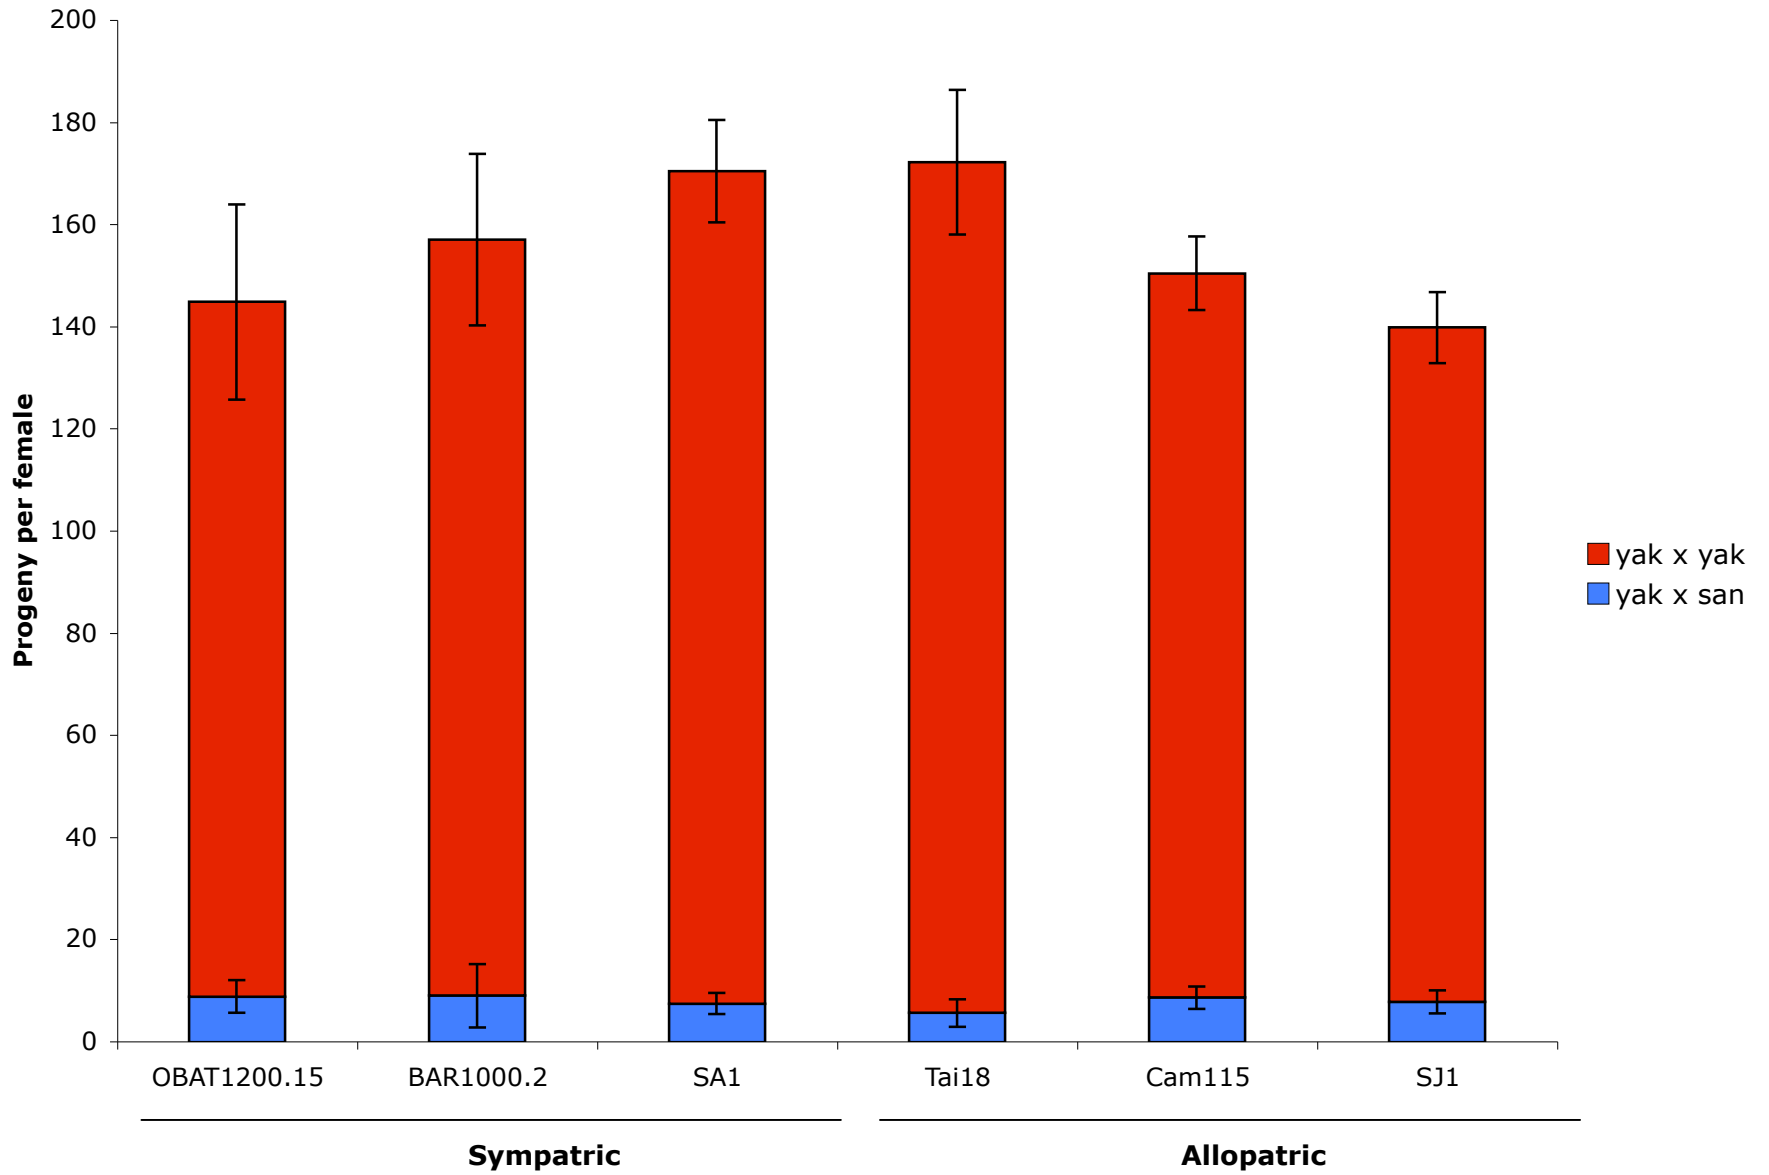

Supplement: pbio.1000341.s002.pdf [file pbio.1000341.s002.pdf]
